# Supplementary material for: Prevalence and compensation of academic leaders, professors, and trustees on publicly traded US healthcare company boards of directors: cross sectional study
Source: PubMed Central journal article supplement — BMJ. 2015 Sep 29;351:h4826. doi: 10.1136/bmj.h4826 (PMC4784763; doi:10.1136/bmj.h4826), 2015-09-29
Supplement: andt026577.wt1_default.pdf [file andt026577.wt1_default.pdf]

**Supplemental Table: Health Care Companies on NASDAQ and NYSE Included in Sample.**

| <b>NAME</b>                            | <b>TICKER</b> | <b>SECTOR</b>                                    | <b>Included<br/>(1=yes, 0=no)</b> | <b>Reason for<br/>exclusion</b> |
|----------------------------------------|---------------|--------------------------------------------------|-----------------------------------|---------------------------------|
| 3M Company                             | MMM           | 4535/4537 Medical Equipment and Medical Supplies | 1                                 |                                 |
| Aastrom Biosciences, Inc.              | ASTM          | 4573 Biotechnology                               | 1                                 |                                 |
| Abbott Laboratories                    | ABT           | 4577 Pharmaceuticals                             | 1                                 |                                 |
| ABIOMED, Inc.                          | ABMD          | 4535/4537 Medical Equipment and Medical Supplies | 1                                 |                                 |
| Acadia Healthcare Company, Inc.        | ACHC          | 4533 Health Care Providers                       | 1                                 |                                 |
| ACADIA Pharmaceuticals Inc.            | ACAD          | 4577 Pharmaceuticals                             | 1                                 |                                 |
| Accretive Health Inc.                  | AH            | 4533 Health Care Providers                       | 0                                 | No DEF14A form                  |
| Accuray Incorporated                   | ARAY          | 4535/4537 Medical Equipment and Medical Supplies | 1                                 |                                 |
| AcelRx Pharmaceuticals, Inc.           | ACRX          | 4577 Pharmaceuticals                             | 1                                 |                                 |
| Achillion Pharmaceuticals, Inc.        | ACHN          | 4577 Pharmaceuticals                             | 1                                 |                                 |
| Acorda Therapeutics, Inc               | ACOR          | 4573 Biotechnology                               | 1                                 |                                 |
| Actavis, Inc.                          | ACT           | 4577 Pharmaceuticals                             | 1                                 |                                 |
| Acura Pharmaceuticals, Inc.            | ACUR          | 4577 Pharmaceuticals                             | 1                                 |                                 |
| Addus HomeCare Corporation             | ADUS          | 4533 Health Care Providers                       | 1                                 |                                 |
| Aegerion Pharmaceuticals, Inc.         | AEGR          | 4577 Pharmaceuticals                             | 1                                 |                                 |
| Aetna Inc.                             | AET           | 4533 Health Care Providers                       | 1                                 |                                 |
| Agenus Inc.                            | AGEN          | 4573 Biotechnology                               | 1                                 |                                 |
| Agios Pharmaceuticals, Inc.            | AGIO          | 4577 Pharmaceuticals                             | 0                                 | Formed in 2013                  |
| Akorn, Inc.                            | AKRX          | 4577 Pharmaceuticals                             | 1                                 |                                 |
| Albany Molecular Research, Inc.        | AMRI          | 4573 Biotechnology                               | 1                                 |                                 |
| Alere Inc                              | ALR           | 4573 Biotechnology                               | 1                                 |                                 |
| Alexion Pharmaceuticals, Inc.          | ALXN          | 4577 Pharmaceuticals                             | 1                                 |                                 |
| Alexza Pharmaceuticals, Inc.           | ALXA          | 4577 Pharmaceuticals                             | 1                                 |                                 |
| Align Technology, Inc.                 | ALGN          | 4535/4537 Medical Equipment and Medical Supplies | 1                                 |                                 |
| Alimera Sciences, Inc.                 | ALIM          | 4577 Pharmaceuticals                             | 1                                 |                                 |
| Allergan, Inc.                         | AGN           | 4577 Pharmaceuticals                             | 1                                 |                                 |
| Alliance HealthCare Services, Inc.     | AIQ           | 4533 Health Care Providers                       | 1                                 |                                 |
| Allied Healthcare Products, Inc.       | AHPI          | 4535/4537 Medical Equipment and Medical Supplies | 1                                 |                                 |
| Almost Family Inc                      | AFAM          | 4533 Health Care Providers                       | 1                                 |                                 |
| Alnylam Pharmaceuticals, Inc.          | ALNY          | 4577 Pharmaceuticals                             | 1                                 |                                 |
| Alpha Pro Tech, Ltd.                   | APT           | 4535/4537 Medical Equipment and Medical Supplies | 1                                 |                                 |
| Alphatec Holdings, Inc.                | ATEC          | 4535/4537 Medical Equipment and Medical Supplies | 1                                 |                                 |
| AMAG Pharmaceuticals, Inc.             | AMAG          | 4577 Pharmaceuticals                             | 1                                 |                                 |
| Amedisys Inc                           | AMED          | 4533 Health Care Providers                       | 1                                 |                                 |
| AMERICAN CARESOURCE HOLDINGS, INC.     | ANCI          | 4533 Health Care Providers                       | 1                                 |                                 |
| American Science and Engineering, Inc. | ASEI          | 4535/4537 Medical Equipment and Medical Supplies | 1                                 |                                 |
| American Shared Hospital Services      | AMS           | 4533 Health Care Providers                       | 1                                 |                                 |

|                                            |      |                                                  |   |                |
|--------------------------------------------|------|--------------------------------------------------|---|----------------|
| AMERIGROUP Corp.                           | AGP  | 4533 Health Care Providers                       | 0 | Merged in 2013 |
| AmerisourceBergen Corporation (Holding Co) | ABC  | 4577 Pharmaceuticals                             | 1 |                |
| Amgen Inc.                                 | AMGN | 4573 Biotechnology                               | 1 |                |
| Amicus Therapeutics, Inc.                  | FOLD | 4577 Pharmaceuticals                             | 1 |                |
| AMN HEALTHCARE SERVICES, INC               | AHS  | 4533 Health Care Providers                       | 1 |                |
| Ampio Pharmaceuticals, Inc.                | AMPE | 4577 Pharmaceuticals                             | 1 |                |
| Amsurg Corp.                               | AMSG | 4533 Health Care Providers                       | 1 |                |
| Anacor Pharmaceuticals, Inc.               | ANAC | 4577 Pharmaceuticals                             | 1 |                |
| AngioDynamics, Inc.                        | ANGO | 4535/4537 Medical Equipment and Medical Supplies | 1 |                |
| Anika Therapeutics Inc.                    | ANIK | 4535/4537 Medical Equipment and Medical Supplies | 1 |                |
| Antares Pharma, Inc.                       | ATRS | 4535/4537 Medical Equipment and Medical Supplies | 1 |                |
| Anthera Pharmaceuticals, Inc.              | ANTH | 4577 Pharmaceuticals                             | 1 |                |
| Aoxing Pharmaceutical Company, Inc.        | AXN  | 4577 Pharmaceuticals                             | 1 |                |
| Apricus Biosciences, Inc                   | APRI | 4577 Pharmaceuticals                             | 1 |                |
| Aratana Therapeutics, Inc.                 | PETX | 4577 Pharmaceuticals                             | 0 | Formed in 2013 |
| ARCA BIOPHARMA, INC                        | ABIO | 4573 Biotechnology                               | 1 |                |
| Arena Pharmaceuticals, Inc.                | ARNA | 4577 Pharmaceuticals                             | 1 |                |
| ARIAD Pharmaceuticals, Inc                 | ARIA | 4573 Biotechnology                               | 1 |                |
| ArQule, Inc.                               | ARQL | 4577 Pharmaceuticals                             | 1 |                |
| Array BioPharma Inc.                       | ARRY | 4577 Pharmaceuticals                             | 1 |                |
| ARRHYTHMIA RESEARCH TECHNOLOGY, INC        | HRT  | 4573 Biotechnology                               | 1 |                |
| ARROWHEAD RESEARCH CORPORATION             | ARWR | 4573 Biotechnology                               | 1 |                |
| ARTHROCARE CORPORATION                     | ARTC | 4573 Biotechnology                               | 1 |                |
| Assisted Living Concepts Inc. Cl A         | ALC  | 4533 Health Care Providers                       | 0 | Merged in 2013 |
| Astex Pharmaceuticals, Inc.                | ASTX | 4577 Pharmaceuticals                             | 1 |                |
| Athersys, Inc.                             | ATHX | 4577 Pharmaceuticals                             | 1 |                |
| AtriCure, Inc.                             | ATRC | 4535/4537 Medical Equipment and Medical Supplies | 1 |                |
| ATRION Corporation                         | ATRI | 4535/4537 Medical Equipment and Medical Supplies | 1 |                |
| Auxilium Pharmaceuticals, Inc.             | AUXL | 4577 Pharmaceuticals                             | 1 |                |
| Avanir Pharmaceuticals, Inc.               | AVNR | 4577 Pharmaceuticals                             | 1 |                |
| AVEO Pharmaceuticals, Inc.                 | AVEO | 4577 Pharmaceuticals                             | 1 |                |
| BACTERIN INTERNATIONAL HOLDINGS, INC.      | BONE | 4573 Biotechnology                               | 1 |                |
| Baxano Surgical, Inc.                      | BAXS | 4535/4537 Medical Equipment and Medical Supplies | 1 |                |
| Baxter International Inc.                  | BAX  | 4535/4537 Medical Equipment and Medical Supplies | 1 |                |
| Becton, Dickinson and Company              | BDX  | 4535/4537 Medical Equipment and Medical Supplies | 1 |                |
| Bio-Rad Laboratories Inc. Cl A             | BIO  | 4535/4537 Medical Equipment and Medical Supplies | 1 |                |
| Bio-Reference Laboratories, Inc.           | BRLI | 4533 Health Care Providers                       | 1 |                |
| Bioanalytical Systems, Inc.                | BASI | 4573 Biotechnology                               | 1 |                |

|                                                                  |      |                                                  |   |                |
|------------------------------------------------------------------|------|--------------------------------------------------|---|----------------|
| BIOCRIST PHARMACEUTICALS, INC.                                   | BCRX | 4573 Biotechnology                               | 1 |                |
| Biodel Inc.                                                      | BIOD | 4577 Pharmaceuticals                             | 1 |                |
| BioDelivery Sciences International, Inc.                         | BDSI | 4577 Pharmaceuticals                             | 1 |                |
| BIOGEN IDEC INC.                                                 | BIIB | 4573 Biotechnology                               | 1 |                |
| Biolase, Inc.                                                    | BIOL | 4535/4537 Medical Equipment and Medical Supplies | 1 |                |
| BioMarin Pharmaceutical Inc.                                     | BMRN | 4577 Pharmaceuticals                             | 1 |                |
| BioSante Pharmaceuticals, Inc. (Merged with ANI Pharmaceuticals) |      | 4577 Pharmaceuticals                             | 1 |                |
| BioScrip, Inc.                                                   | BIOS | 4533 Health Care Providers                       | 1 |                |
| BioSpecifics Technologies Corp                                   | BSTC | 4577 Pharmaceuticals                             | 1 |                |
| Biota Pharmaceuticals, Inc                                       | BOTA | 4573 Biotechnology                               | 1 |                |
| BioTime, Inc.                                                    | BTX  | 4573 Biotechnology                               | 1 |                |
| Birner Dental Management Services, Inc.                          | BDMS | 4533 Health Care Providers                       | 1 |                |
| bluebird bio, Inc.                                               | BLUE | 4573 Biotechnology                               | 0 | Formed in 2013 |
| Blyth, Inc.                                                      | BTH  | 4577 Pharmaceuticals                             | 1 |                |
| Boston Scientific Corporation                                    | BSX  | 4535/4537 Medical Equipment and Medical Supplies | 1 |                |
| Bovie Medical Corporation                                        | BVX  | 4535/4537 Medical Equipment and Medical Supplies | 1 |                |
| Bristol-Myers Squibb Company                                     | BMY  | 4577 Pharmaceuticals                             | 1 |                |
| Brookdale Senior Living Inc.                                     | BKD  | 4533 Health Care Providers                       | 1 |                |
| BSD MEDICAL CORPORATION                                          | BSDM | 4573 Biotechnology                               | 1 |                |
| C.R. Bard, Inc.                                                  | BCR  | 4535/4537 Medical Equipment and Medical Supplies | 1 |                |
| Cadence Pharmaceuticals, Inc.                                    | CADX | 4577 Pharmaceuticals                             | 1 |                |
| Cambrex Corporation                                              | CBM  | 4577 Pharmaceuticals                             | 1 |                |
| Cancer Genetics, Inc.                                            | CGIX | 4533 Health Care Providers                       | 0 | Formed in 2013 |
| Cantel Medical Corp.                                             | CMN  | 4535/4537 Medical Equipment and Medical Supplies | 1 |                |
| Capital Senior Living Corporation                                | CSU  | 4533 Health Care Providers                       | 1 |                |
| Cardica, Inc.                                                    | CRDC | 4535/4537 Medical Equipment and Medical Supplies | 1 |                |
| Cardinal Health, Inc.                                            | CAH  | 4577 Pharmaceuticals                             | 1 |                |
| Cardiovascular Systems, Inc.                                     | CSII | 4535/4537 Medical Equipment and Medical Supplies | 1 |                |
| CARDIUM THERAPEUTICS, INC                                        | CXM  | 4573 Biotechnology                               | 1 |                |
| CareFusion Corp.                                                 | CFN  | 4535/4537 Medical Equipment and Medical Supplies | 1 |                |
| CAS Medical Systems, Inc.                                        | CASM | 4535/4537 Medical Equipment and Medical Supplies | 1 |                |
| Catalyst Pharmaceutical Partners, Inc.                           | CPRX | 4577 Pharmaceuticals                             | 1 |                |
| CEL-SCI CORPORATION                                              | CVM  | 4573 Biotechnology                               | 1 |                |
| Celgene Corporation                                              | CELG | 4577 Pharmaceuticals                             | 1 |                |
| Cell Therapeutics, Inc.                                          | CTIC | 4577 Pharmaceuticals                             | 1 |                |
| Celldex Therapeutics, Inc                                        | CLDX | 4573 Biotechnology                               | 1 |                |
| Cellular Dynamics International, Inc.                            | ICEL | 4573 Biotechnology                               | 0 | Formed in 2013 |
| Celsion Corporation                                              | CLSN | 4577 Pharmaceuticals                             | 1 |                |
| Cempra, Inc.                                                     | CEMP | 4577 Pharmaceuticals                             | 1 |                |

|                                               |      |                                                  |   |                |
|-----------------------------------------------|------|--------------------------------------------------|---|----------------|
| Centene Corporation                           | CNC  | 4533 Health Care Providers                       | 1 |                |
| Cerus Corporation                             | CERS | 4535/4537 Medical Equipment and Medical Supplies | 1 |                |
| CHARLES RIVER LABORATORIES INTERNATIONAL, INC | CRL  | 4573 Biotechnology                               | 1 |                |
| CHELSEA THERAPEUTICS INTERNATIONAL, LTD       | CHTP | 4573 Biotechnology                               | 1 |                |
| Chembio Diagnostics, Inc.                     | CEMI | 4577 Pharmaceuticals                             | 1 |                |
| Chemed Corp.                                  | CHE  | 4533 Health Care Providers                       | 1 |                |
| ChemoCentryx, Inc.                            | CCXI | 4577 Pharmaceuticals                             | 1 |                |
| Chimerix, Inc.                                | CMRX | 4577 Pharmaceuticals                             | 0 | Formed in 2013 |
| Chindex International, Inc.                   | CHDX | 4533 Health Care Providers                       | 1 |                |
| Cigna Corporation                             | CI   | 4533 Health Care Providers                       | 1 |                |
| Cleveland BioLabs, Inc.                       | CBLI | 4573 Biotechnology                               | 1 |                |
| Clovis Oncology, Inc.                         | CLVS | 4577 Pharmaceuticals                             | 1 |                |
| Columbia Laboratories, Inc.                   | CBRX | 4577 Pharmaceuticals                             | 1 |                |
| COMMUNITY HEALTH SYSTEMS, INC                 | CYH  | 4533 Health Care Providers                       | 1 |                |
| Conatus Pharmaceuticals Inc.                  | CNAT | 4577 Pharmaceuticals                             | 0 | Formed in 2013 |
| CONMED CORPORATION                            | CNMD | 4573 Biotechnology                               | 1 |                |
| Corcept Therapeutics Incorporated             | CORT | 4577 Pharmaceuticals                             | 1 |                |
| Cornerstone Therapeutics Inc.                 | CRTX | 4577 Pharmaceuticals                             | 1 |                |
| COVANCE INC.                                  | CVD  | 4573 Biotechnology                               | 1 |                |
| Coventry Health Care Inc.                     | CVH  | 4533 Health Care Providers                       | 0 | Merged in 2013 |
| Covidien PLC                                  | COV  | 4535/4537 Medical Equipment and Medical Supplies | 1 |                |
| CryoLife, Inc.                                | CRY  | 4535/4537 Medical Equipment and Medical Supplies | 1 |                |
| Cubist Pharmaceuticals, Inc.                  | CBST | 4577 Pharmaceuticals                             | 1 |                |
| Cumberland Pharmaceuticals Inc.               | CPIX | 4577 Pharmaceuticals                             | 1 |                |
| CURIS, INC                                    | CRIS | 4573 Biotechnology                               | 1 |                |
| CUTERA, INC                                   | CUTR | 4573 Biotechnology                               | 1 |                |
| CVS Corporation                               | CVS  | 4533 Health Care Providers                       | 1 |                |
| CYBERONICS, INC.                              | CYBX | 4573 Biotechnology                               | 1 |                |
| Cynosure, Inc.                                | CYNO | 4573 Biotechnology                               | 1 |                |
| Cytokinetics, Incorporated                    | CYTK | 4577 Pharmaceuticals                             | 1 |                |
| Cytori Therapeutics Inc                       | CYTX | 4535/4537 Medical Equipment and Medical Supplies | 1 |                |
| CytRx Corporation                             | CYTR | 4573 Biotechnology                               | 1 |                |
| DARA Biosciences, Inc.                        | DARA | 4577 Pharmaceuticals                             | 1 |                |
| DaVita healthCare Partners Inc.               | DVA  | 4533 Health Care Providers                       | 1 |                |
| Daxor Corporation                             | DXR  | 4535/4537 Medical Equipment and Medical Supplies | 1 |                |
| Delcath Systems, Inc.                         | DCTH | 4535/4537 Medical Equipment and Medical Supplies | 1 |                |
| Dendreon Corporation                          | DNDN | 4577 Pharmaceuticals                             | 1 |                |
| DENTSPLY International Inc.                   | XRAY | 4535/4537 Medical Equipment and Medical Supplies | 1 |                |
| Depomed, Inc.                                 | DEPO | 4577 Pharmaceuticals                             | 1 |                |
| Derma Sciences, Inc.                          | DSCI | 4535/4537 Medical Equipment and                  | 1 |                |

|                                      |      |                                                  |   |                |
|--------------------------------------|------|--------------------------------------------------|---|----------------|
|                                      |      | Medical Supplies                                 |   |                |
| DexCom, Inc.                         | DXCM | 4535/4537 Medical Equipment and Medical Supplies | 1 |                |
| Digirad Corporation                  | DRAD | 4573 Biotechnology                               | 1 |                |
| Discovery Laboratories, Inc.         | DSCO | 4573 Biotechnology                               | 1 |                |
| Diversicare Healthcare Services Inc. | DVCR | 4533 Health Care Providers                       | 1 |                |
| Durata Therapeutics, Inc.            | DRTX | 4577 Pharmaceuticals                             | 1 |                |
| Durect Corporation                   | DRRX | 4577 Pharmaceuticals                             | 1 |                |
| Dyax Corp.                           | DYAX | 4573 Biotechnology                               | 1 |                |
| Dynavax Technologies Corporation     | DVAX | 4577 Pharmaceuticals                             | 1 |                |
| Echo Therapeutics, Inc.              | ECTE | 4573 Biotechnology                               | 1 |                |
| Edwards Lifesciences Corporation     | EW   | 4535/4537 Medical Equipment and Medical Supplies | 1 |                |
| Eli Lilly and Company                | LLY  | 4577 Pharmaceuticals                             | 1 |                |
| Emergent Biosolutions Inc.           | EBS  | 4573 Biotechnology                               | 1 |                |
| Emeritus Corporation                 | ESC  | 4533 Health Care Providers                       | 1 |                |
| Enanta Pharmaceuticals, Inc.         | ENTA | 4577 Pharmaceuticals                             | 0 | Formed in 2013 |
| Endo Health Solutions Inc.           | ENDP | 4577 Pharmaceuticals                             | 1 |                |
| Endocyte, Inc.                       | ECYT | 4577 Pharmaceuticals                             | 1 |                |
| Endologix, Inc.                      | ELGX | 4535/4537 Medical Equipment and Medical Supplies | 1 |                |
| EnteroMedics Inc.                    | ETRM | 4573 Biotechnology                               | 1 |                |
| EntreMed, Inc.                       | ENMD | 4573 Biotechnology                               | 1 |                |
| Enzo Biochem, Inc.                   | ENZ  | 4533 Health Care Providers                       | 1 |                |
| Enzon Pharmaceuticals, Inc.          | ENZN | 4573 Biotechnology                               | 1 |                |
| Epizyme, Inc.                        | EPZM | 4577 Pharmaceuticals                             | 0 | Formed in 2013 |
| ERBA Diagnostics, Inc.               | ERB  | 4577 Pharmaceuticals                             | 1 |                |
| Escalon Medical Corp.                | ESMC | 4573 Biotechnology                               | 1 |                |
| Esperion Therapeutics, Inc.          | ESPR | 4577 Pharmaceuticals                             | 0 | Formed in 2013 |
| EXACT Sciences Corporation           | EXAS | 4573 Biotechnology                               | 1 |                |
| Exactech, Inc.                       | EXAC | 4535/4537 Medical Equipment and Medical Supplies | 1 |                |
| Exelixis, Inc.                       | EXEL | 4573 Biotechnology                               | 1 |                |
| Express Scripts Holding Company      | ESRX | 4533 Health Care Providers                       | 1 |                |
| Fibrocell Science Inc                | FCSC | 4577 Pharmaceuticals                             | 1 |                |
| Five Star Quality Care, Inc.         | FVE  | 4533 Health Care Providers                       | 1 |                |
| Fonar Corporation                    | FONR | 4573 Biotechnology                               | 1 |                |
| Forest Laboratories, Inc.            | FRX  | 4577 Pharmaceuticals                             | 1 |                |
| Furiex Pharmaceuticals, Inc.         | FURX | 4577 Pharmaceuticals                             | 1 |                |
| Galectin Therapeutics Inc.           | GALT | 4577 Pharmaceuticals                             | 1 |                |
| Galena Biopharma, Inc.               | GALE | 4577 Pharmaceuticals                             | 1 |                |
| GenMark Diagnostics, Inc.            | GNMK | 4535/4537 Medical Equipment and Medical Supplies | 1 |                |
| Genomic Health, Inc.                 | GHDX | 4533 Health Care Providers                       | 1 |                |
| Gentiva Health Services, Inc.        | GTIV | 4533 Health Care Providers                       | 1 |                |
| GenVec, Inc.                         | GNVC | 4577 Pharmaceuticals                             | 1 |                |
| Geron Corporation                    | GERN | 4577 Pharmaceuticals                             | 1 |                |
| Gilead Sciences, Inc.                | GILD | 4573 Biotechnology                               | 1 |                |

|                                    |      |                                                  |   |                |
|------------------------------------|------|--------------------------------------------------|---|----------------|
| GTx, Inc.                          | GTXI | 4577 Pharmaceuticals                             | 1 |                |
| Haemonetics Corporation            | HAE  | 4535/4537 Medical Equipment and Medical Supplies | 1 |                |
| Halozyme Therapeutics, Inc.        | HALO | 4573 Biotechnology                               | 1 |                |
| Hanger, Inc.                       | HGR  | 4533 Health Care Providers                       | 1 |                |
| Hansen Medical, Inc.               | HNSN | 4535/4537 Medical Equipment and Medical Supplies | 1 |                |
| HCA Holdings Inc.                  | HCA  | 4533 Health Care Providers                       | 1 |                |
| Health Management Associates, Inc. | HMA  | 4533 Health Care Providers                       | 1 |                |
| Health Net Inc.                    | HNT  | 4533 Health Care Providers                       | 1 |                |
| HealthSouth Corporation            | HLS  | 4533 Health Care Providers                       | 1 |                |
| Healthways, Inc.                   | HWAY | 4533 Health Care Providers                       | 1 |                |
| Heartware International, Inc.      | HTWR | 4535/4537 Medical Equipment and Medical Supplies | 1 |                |
| Heat Biologics, Inc.               | HTBX | 4577 Pharmaceuticals                             | 0 | Formed in 2013 |
| Hemispherx BioPharma, Inc.         | HEB  | 4573 Biotechnology                               | 1 |                |
| Henry Schein, Inc.                 | HSIC | 4533 Health Care Providers                       | 1 |                |
| Heska Corporation                  | HSKA | 4573 Biotechnology                               | 1 |                |
| Hi-Tech Pharmacal Co., Inc.        | HITK | 4577 Pharmaceuticals                             | 0 | Merged in 2013 |
| Hill-Rom Holdings Inc              | HRC  | 4535/4537 Medical Equipment and Medical Supplies | 1 |                |
| Hologic, Inc.                      | HOLX | 4535/4537 Medical Equipment and Medical Supplies | 1 |                |
| Hooper Holmes, Inc.                | HH   | 4533 Health Care Providers                       | 1 |                |
| Horizon Pharma, Inc.               | HZNP | 4577 Pharmaceuticals                             | 1 |                |
| Hospira Inc.                       | HSP  | 4577 Pharmaceuticals                             | 1 |                |
| Humana Inc.                        | HUM  | 4533 Health Care Providers                       | 1 |                |
| Hyperion Therapeutics, Inc.        | HPTX | 4577 Pharmaceuticals                             | 1 |                |
| iBio, Inc.                         | IBIO | 4577 Pharmaceuticals                             | 1 |                |
| icad inc.                          | ICAD | 4535/4537 Medical Equipment and Medical Supplies | 1 |                |
| ICU Medical, Inc.                  | ICUI | 4535/4537 Medical Equipment and Medical Supplies | 1 |                |
| Idenix Pharmaceuticals, Inc.       | IDIX | 4577 Pharmaceuticals                             | 1 |                |
| Idera Pharmaceuticals, Inc.        | IDRA | 4573 Biotechnology                               | 1 |                |
| IDEXX Laboratories, Inc.           | IDXX | 4573 Biotechnology                               | 1 |                |
| IGI Laboratories, Inc.             | IG   | 4573 Biotechnology                               | 1 |                |
| ImmuCell Corporation               | ICCC | 4573 Biotechnology                               | 1 |                |
| ImmunoCellular Therapeutics, Ltd.  | IMUC | 4577 Pharmaceuticals                             | 1 |                |
| ImmunoGen, Inc.                    | IMGN | 4577 Pharmaceuticals                             | 1 |                |
| Immunomedics, Inc.                 | IMMU | 4573 Biotechnology                               | 1 |                |
| Impax Laboratories, Inc.           | IPXL | 4577 Pharmaceuticals                             | 1 |                |
| Incyte Corporation                 | INCY | 4573 Biotechnology                               | 1 |                |
| Infinity Pharmaceuticals, Inc.     | INFI | 4577 Pharmaceuticals                             | 1 |                |
| InfuSystems Holdings, Inc.         | INFU | 4535/4537 Medical Equipment and Medical Supplies | 1 |                |
| Inovio Pharmaceuticals, Inc.       | INO  | 4535/4537 Medical Equipment and Medical Supplies | 1 |                |
| Insmed, Inc.                       | INSM | 4577 Pharmaceuticals                             | 1 |                |
| Insulet Corporation                | PODD | 4535/4537 Medical Equipment and                  | 1 |                |

|                                            |      |                                                  |   |                |
|--------------------------------------------|------|--------------------------------------------------|---|----------------|
|                                            |      | Medical Supplies                                 |   |                |
| Insys Therapeutics, Inc.                   | INSY | 4577 Pharmaceuticals                             | 0 | Formed in 2013 |
| Intercept Pharmaceuticals, Inc.            | ICPT | 4577 Pharmaceuticals                             | 1 |                |
| InterMune, Inc.                            | ITMN | 4577 Pharmaceuticals                             | 1 |                |
| Intuitive Surgical, Inc.                   | ISRG | 4535/4537 Medical Equipment and Medical Supplies | 1 |                |
| Invacare Corporation                       | IVC  | 4535/4537 Medical Equipment and Medical Supplies | 1 |                |
| IPC The Hospitalist Company, Inc.          | IPCM | 4533 Health Care Providers                       | 1 |                |
| IRIDEX Corporation                         | IRIX | 4573 Biotechnology                               | 1 |                |
| Ironwood Pharmaceuticals, Inc.             | IRWD | 4577 Pharmaceuticals                             | 1 |                |
| Isis Pharmaceuticals, Inc.                 | ISIS | 4577 Pharmaceuticals                             | 1 |                |
| IsoRay, Inc.                               | ISR  | 4535/4537 Medical Equipment and Medical Supplies | 1 |                |
| Johnson & Johnson                          | JNJ  | 4577 Pharmaceuticals                             | 1 |                |
| K-V Pharmaceutical Co. Cl A                | KV/A | 4577 Pharmaceuticals                             | 0 | Merged in 2013 |
| KaloBios Pharmaceuticals, Inc.             | KBIO | 4577 Pharmaceuticals                             | 1 |                |
| Keryx Biopharmaceuticals, Inc.             | KERX | 4577 Pharmaceuticals                             | 1 |                |
| Kindred Healthcare, Inc.                   | KND  | 4533 Health Care Providers                       | 1 |                |
| Kips Bay Medical, Inc.                     | KIPS | 4535/4537 Medical Equipment and Medical Supplies | 1 |                |
| Kythera Biopharmaceuticals, Inc.           | KYTH | 4577 Pharmaceuticals                             | 1 |                |
| Laboratory Corporation of America Holdings | LH   | 4533 Health Care Providers                       | 1 |                |
| Lakeland Industries, Inc.                  | LAKE | 4535/4537 Medical Equipment and Medical Supplies | 1 |                |
| Lannett Co Inc                             | LCI  | 4577 Pharmaceuticals                             | 1 |                |
| LCA-Vision Inc.                            | LCAV | 4533 Health Care Providers                       | 1 |                |
| LeMaitre Vascular, Inc.                    | LMAT | 4535/4537 Medical Equipment and Medical Supplies | 1 |                |
| Lexicon Pharmaceuticals, Inc.              | LXRX | 4577 Pharmaceuticals                             | 1 |                |
| LHC Group                                  | LHCG | 4533 Health Care Providers                       | 1 |                |
| Life Technologies Corporation              | LIFE | 4573 Biotechnology                               | 1 |                |
| LifePoint Hospitals, Inc.                  | LPNT | 4533 Health Care Providers                       | 1 |                |
| Lifevantage Corporation                    | LFVN | 4577 Pharmaceuticals                             | 1 |                |
| Ligand Pharmaceuticals Incorporated        | LGND | 4577 Pharmaceuticals                             | 1 |                |
| LipoScience, Inc.                          | LPDX | 4573 Biotechnology                               | 1 |                |
| Lpath, Inc.                                | LPTN | 4573 Biotechnology                               | 1 |                |
| Luminex Corporation                        | LMNX | 4535/4537 Medical Equipment and Medical Supplies | 1 |                |
| Luna Innovations Incorporated              | LUNA | 4573 Biotechnology                               | 1 |                |
| Magellan Health Services, Inc.             | MGLN | 4533 Health Care Providers                       | 1 |                |
| MAKO Surgical Corp.                        | MAKO | 4535/4537 Medical Equipment and Medical Supplies | 1 |                |
| MannKind Corporation                       | MNKD | 4577 Pharmaceuticals                             | 1 |                |
| Masimo Corporation                         | MASI | 4573 Biotechnology                               | 1 |                |
| Mast Therapeutics, Inc.                    | MSTX | 4577 Pharmaceuticals                             | 1 |                |
| McKesson Corporation                       | MCK  | 4577 Pharmaceuticals                             | 1 |                |
| Medco Health Solutions Inc.                | MHS  | 4533 Health Care Providers                       | 0 | Merged in 2013 |

|                                   |       |                                                  |   |                |
|-----------------------------------|-------|--------------------------------------------------|---|----------------|
| Medical Action Industries Inc.    | MDCI  | 4535/4537 Medical Equipment and Medical Supplies | 1 |                |
| MediciNova, Inc.                  | MNOV  | 4577 Pharmaceuticals                             | 1 |                |
| Medivation, Inc.                  | MDVN  | 4577 Pharmaceuticals                             | 1 |                |
| Mednax, Inc                       | MD    | 4533 Health Care Providers                       | 1 |                |
| Medtronic, Inc.                   | MDT   | 4573 Biotechnology                               | 1 |                |
| MEI Pharma, Inc.                  | MEIP  | 4577 Pharmaceuticals                             | 1 |                |
| MELA Sciences, Inc                | MELA  | 4535/4537 Medical Equipment and Medical Supplies | 1 |                |
| Merck & Company, Inc.             | MRK   | 4577 Pharmaceuticals                             | 1 |                |
| Meridian Bioscience Inc.          | VIVO  | 4573 Biotechnology                               | 1 |                |
| Merit Medical Systems, Inc.       | MMSI  | 4535/4537 Medical Equipment and Medical Supplies | 1 |                |
| Metropolitan Health Networks Inc. | MDF   | 4533 Health Care Providers                       | 0 | Merged in 2013 |
| MGC Diagnostics Corporation       | MGCD  | 4535/4537 Medical Equipment and Medical Supplies | 1 |                |
| MiMedx Group, Inc                 | MDXG  | 4535/4537 Medical Equipment and Medical Supplies | 1 |                |
| Mine Safety Appliances Company    | MSA   | 4535/4537 Medical Equipment and Medical Supplies | 1 |                |
| Mirati Therapeutics, Inc.         | MRTX  | 4577 Pharmaceuticals                             | 0 | Formed in 2013 |
| Molina Healthcare Inc             | MOH   | 4533 Health Care Providers                       | 1 |                |
| Momenta Pharmaceuticals, Inc.     | MNTA  | 4573 Biotechnology                               | 1 |                |
| MWI Veterinary Supply, Inc.       | MWIV  | 4533 Health Care Providers                       | 1 |                |
| Mylan Inc.                        | MYL   | 4577 Pharmaceuticals                             | 1 |                |
| Myriad Genetics, Inc.             | MYGN  | 4573 Biotechnology                               | 1 |                |
| Nanosphere, Inc.                  | NSPH  | 4535/4537 Medical Equipment and Medical Supplies | 1 |                |
| NanoString Technologies, Inc.     | NSTG  | 4573 Biotechnology                               | 0 | Formed in 2013 |
| National HealthCare Corporation   | NHC   | 4533 Health Care Providers                       | 1 |                |
| National Research Corporation     | NRCIA | 4573 Biotechnology                               | 1 |                |
| National Technical Systems, Inc.  | NTSC  | 4535/4537 Medical Equipment and Medical Supplies | 1 |                |
| Natures Sunshine Products, Inc.   | NATR  | 4577 Pharmaceuticals                             | 1 |                |
| Natus Medical Incorporated        | BABY  | 4573 Biotechnology                               | 1 |                |
| Navidea Biopharmaceuticals, Inc.  | NAVB  | 4573 Biotechnology                               | 1 |                |
| Nektar Therapeutics               | NKTR  | 4577 Pharmaceuticals                             | 1 |                |
| Neogen Corporation                | NEOG  | 4573 Biotechnology                               | 1 |                |
| Neostem, Inc.                     | NBS   | 4533 Health Care Providers                       | 1 |                |
| Neuralstem, Inc.                  | CUR   | 4573 Biotechnology                               | 1 |                |
| Neurocrine Biosciences, Inc.      | NBIX  | 4573 Biotechnology                               | 1 |                |
| NewLink Genetics Corporation      | NLNK  | 4577 Pharmaceuticals                             | 1 |                |
| Northwest Biotherapeutics, Inc.   | NWBO  | 4577 Pharmaceuticals                             | 1 |                |
| Novavax, Inc.                     | NVAX  | 4573 Biotechnology                               | 1 |                |
| NPS Pharmaceuticals, Inc.         | NPSP  | 4573 Biotechnology                               | 1 |                |
| Nu Skin Enterprises, Inc.         | NUS   | 4577 Pharmaceuticals                             | 1 |                |
| NuVasive, Inc.                    | NUVA  | 4535/4537 Medical Equipment and Medical Supplies | 1 |                |
| NxStage Medical, Inc.             | NXTM  | 4573 Biotechnology                               | 1 |                |



|                                    |      |                                                  |   |                |
|------------------------------------|------|--------------------------------------------------|---|----------------|
| Ocera Therapeutics, Inc.           | OCRX | 4577 Pharmaceuticals                             | 1 |                |
| Oculus Innovative Sciences, Inc.   | OCLS | 4535/4537 Medical Equipment and Medical Supplies | 1 |                |
| Omeros Corporation                 | OMER | 4577 Pharmaceuticals                             | 1 |                |
| Omnicare, Inc.                     | OCR  | 4533 Health Care Providers                       | 1 |                |
| OncoGenex Pharmaceuticals Inc.     | OGXI | 4573 Biotechnology                               | 1 |                |
| OncoMed Pharmaceuticals, Inc.      | OMED | 4577 Pharmaceuticals                             | 0 | Formed in 2013 |
| Onconova Therapeutics, Inc.        | ONTX | 4577 Pharmaceuticals                             | 0 | Formed in 2013 |
| Oncothyreon Inc.                   | ONTY | 4573 Biotechnology                               | 1 |                |
| ONYX Pharmaceuticals, Inc.         | ONXX | 4573 Biotechnology                               | 1 |                |
| Opexa Therapeutics, Inc.           | OPXA | 4577 Pharmaceuticals                             | 1 |                |
| Opko Health Inc                    | OPK  | 4577 Pharmaceuticals                             | 0 | No DEF14A form |
| Optimer Pharmaceuticals, Inc.      | OPTR | 4577 Pharmaceuticals                             | 1 |                |
| Orogenics, Inc.                    | OGEN | 4577 Pharmaceuticals                             | 1 |                |
| OraSure Technologies, Inc.         | OSUR | 4535/4537 Medical Equipment and Medical Supplies | 1 |                |
| Orexigen Therapeutics, Inc.        | OREX | 4577 Pharmaceuticals                             | 1 |                |
| Organovo Holdings, Inc.            | ONVO | 4573 Biotechnology                               | 1 |                |
| Osiris Therapeutics, Inc.          | OSIR | 4573 Biotechnology                               | 1 |                |
| Ovascience Inc.                    | OVAS | 4577 Pharmaceuticals                             | 1 |                |
| Owens & Minor, Inc.                | OMI  | 4533 Health Care Providers                       | 1 |                |
| OXiGENE, Inc.                      | OXGN | 4573 Biotechnology                               | 1 |                |
| Pacira Pharmaceuticals, Inc.       | PCRX | 4577 Pharmaceuticals                             | 1 |                |
| Pain Therapeutics                  | PTIE | 4577 Pharmaceuticals                             | 1 |                |
| Palatin Technologies, Inc.         | PTN  | 4577 Pharmaceuticals                             | 1 |                |
| Par Pharmaceutical Cos. Inc.       | PRX  | 4577 Pharmaceuticals                             | 0 | Merged in 2013 |
| PAREXEL International Corporation  | PRXL | 4573 Biotechnology                               | 1 |                |
| Patterson Companies, Inc.          | PDCO | 4533 Health Care Providers                       | 1 |                |
| PDL BioPharma, Inc.                | PDLI | 4573 Biotechnology                               | 1 |                |
| Peregrine Pharmaceuticals Inc.     | PPHM | 4577 Pharmaceuticals                             | 1 |                |
| Pernix Therapeutics Holdings, Inc. | PTX  | 4577 Pharmaceuticals                             | 1 |                |
| Perrigo Company                    | PRGO | 4577 Pharmaceuticals                             | 0 | Formed in 2013 |
| PetMed Express, Inc.               | PETS | 4533 Health Care Providers                       | 1 |                |
| Pfizer, Inc.                       | PFE  | 4577 Pharmaceuticals                             | 1 |                |
| Pharmacyclics, Inc.                | PCYC | 4577 Pharmaceuticals                             | 1 |                |
| PharMerica Corp.                   | PMC  | 4533 Health Care Providers                       | 1 |                |
| PhotoMedex, Inc.                   | PHMD | 4573 Biotechnology                               | 1 |                |
| Portola Pharmaceuticals, Inc.      | PTLA | 4577 Pharmaceuticals                             | 0 | Formed in 2013 |
| Pozen, Inc.                        | POZN | 4577 Pharmaceuticals                             | 1 |                |
| Prestige Brands Holdings Inc.      | PBH  | 4577 Pharmaceuticals                             | 1 |                |
| Pro-Dex, Inc.                      | PDEX | 4535/4537 Medical Equipment and Medical Supplies | 1 |                |
| Progenics Pharmaceuticals Inc.     | PGNX | 4577 Pharmaceuticals                             | 1 |                |
| ProPhase Labs, Inc.                | PRPH | 4577 Pharmaceuticals                             | 1 |                |
| Prothena Corporation plc           | PRTA | 4577 Pharmaceuticals                             | 1 |                |

|                                     |      |                                                  |   |                |
|-------------------------------------|------|--------------------------------------------------|---|----------------|
| Psychemedics Corporation            | PMD  | 4533 Health Care Providers                       | 1 |                |
| PTC Therapeutics, Inc.              | PTCT | 4577 Pharmaceuticals                             | 0 | Formed in 2013 |
| Puma Biotechnology Inc              | PBYI | 4577 Pharmaceuticals                             | 1 |                |
| QLT Inc.                            | QLTI | 4577 Pharmaceuticals                             | 1 |                |
| Quest Diagnostics Incorporated      | DGX  | 4533 Health Care Providers                       | 1 |                |
| Questcor Pharmaceuticals, Inc.      | QCOR | 4577 Pharmaceuticals                             | 1 |                |
| Quidel Corporation                  | QDEL | 4573 Biotechnology                               | 1 |                |
| RadNet, Inc.                        | RDNT | 4533 Health Care Providers                       | 1 |                |
| Raptor Pharmaceutical Corp.         | RPTP | 4577 Pharmaceuticals                             | 1 |                |
| Receptos, Inc.                      | RCPT | 4577 Pharmaceuticals                             | 0 | Formed in 2013 |
| Regeneron Pharmaceuticals, Inc.     | REGN | 4577 Pharmaceuticals                             | 1 |                |
| Regulus Therapeutics Inc.           | RGLS | 4577 Pharmaceuticals                             | 1 |                |
| Reliv International, Inc.           | RELV | 4577 Pharmaceuticals                             | 1 |                |
| Repligen Corporation                | RGEN | 4573 Biotechnology                               | 1 |                |
| Repros Therapeutics Inc.            | RPRX | 4573 Biotechnology                               | 1 |                |
| ResMed Inc.                         | RMD  | 4535/4537 Medical Equipment and Medical Supplies | 1 |                |
| Response Genetics, Inc.             | RGDX | 4573 Biotechnology                               | 1 |                |
| Retractable Technologies, Inc.      | RVP  | 4535/4537 Medical Equipment and Medical Supplies | 1 |                |
| Rexahn Pharmaceuticals, Inc.        | RNN  | 4577 Pharmaceuticals                             | 1 |                |
| Rigel Pharmaceuticals, Inc.         | RIGL | 4577 Pharmaceuticals                             | 1 |                |
| Rite Aid Corporation                | RAD  | 4533 Health Care Providers                       | 1 |                |
| Rochester Medical Corporation       | ROCM | 4535/4537 Medical Equipment and Medical Supplies | 0 | Merged in 2013 |
| Rockwell Medical, Inc.              | RMTI | 4573 Biotechnology                               | 1 |                |
| RTI Surgical, Inc.                  | RTIX | 4535/4537 Medical Equipment and Medical Supplies | 1 |                |
| Sagent Pharmaceuticals, Inc.        | SGNT | 4577 Pharmaceuticals                             | 1 |                |
| Salix Pharmaceuticals, Ltd.         | SLXP | 4577 Pharmaceuticals                             | 1 |                |
| Sangamo BioSciences, Inc.           | SGMO | 4573 Biotechnology                               | 1 |                |
| Santarus, Inc.                      | SNTS | 4577 Pharmaceuticals                             | 1 |                |
| Sarepta Therapeutics, Inc.          | SRPT | 4577 Pharmaceuticals                             | 1 |                |
| SciClone Pharmaceuticals, Inc.      | SCLN | 4577 Pharmaceuticals                             | 1 |                |
| Seattle Genetics, Inc.              | SGEN | 4573 Biotechnology                               | 1 |                |
| Select Medical Holdings Corporation | SEM  | 4533 Health Care Providers                       | 1 |                |
| Senomyx, Inc.                       | SNMX | 4573 Biotechnology                               | 1 |                |
| SIGA Technologies Inc.              | SIGA | 4577 Pharmaceuticals                             | 1 |                |
| Sirona Dental Systems, Inc.         | SIRO | 4535/4537 Medical Equipment and Medical Supplies | 1 |                |
| Skilled Healthcare Group Inc. Cl A  | SKH  | 4533 Health Care Providers                       | 0 | No DEF14A form |
| Solta Medical, Inc                  | SLTM | 4573 Biotechnology                               | 1 |                |
| Span-America Medical Systems, Inc.  | SPAN | 4535/4537 Medical Equipment and Medical Supplies | 1 |                |
| Spectrum Pharmaceuticals, Inc.      | SPPI | 4577 Pharmaceuticals                             | 1 |                |
| Spherix Incorporated                | SPEX | 4535/4537 Medical Equipment and Medical Supplies | 1 |                |
| St. Jude Medical, Inc.              | STJ  | 4573 Biotechnology                               | 1 |                |

|                                    |      |                                                  |   |                |
|------------------------------------|------|--------------------------------------------------|---|----------------|
| STAAR Surgical Company             | STAA | 4535/4537 Medical Equipment and Medical Supplies | 1 |                |
| StemCells, Inc.                    | STEM | 4573 Biotechnology                               | 1 |                |
| Stereotaxis, Inc.                  | STXS | 4573 Biotechnology                               | 1 |                |
| STERIS Corporation                 | STE  | 4535/4537 Medical Equipment and Medical Supplies | 1 |                |
| Stryker Corporation                | SYK  | 4535/4537 Medical Equipment and Medical Supplies | 1 |                |
| Sucampo Pharmaceuticals, Inc.      | SCMP | 4577 Pharmaceuticals                             | 1 |                |
| Sunesis Pharmaceuticals, Inc.      | SNSS | 4577 Pharmaceuticals                             | 1 |                |
| SunLink Health Systems, Inc.       | SSY  | 4533 Health Care Providers                       | 1 |                |
| Sunrise Senior Living Inc.         | SRZ  | 4533 Health Care Providers                       | 0 | Merged in 2013 |
| Sunshine Heart Inc                 | SSH  | 4573 Biotechnology                               | 1 |                |
| Supernus Pharmaceuticals, Inc.     | SUPN | 4577 Pharmaceuticals                             | 1 |                |
| SurModics, Inc.                    | SRDX | 4535/4537 Medical Equipment and Medical Supplies | 1 |                |
| Symmetry Medical Inc.              | SMA  | 4535/4537 Medical Equipment and Medical Supplies | 1 |                |
| Synageva BioPharma Corp.           | GEVA | 4573 Biotechnology                               | 1 |                |
| Synergetics USA, Inc.              | SURG | 4573 Biotechnology                               | 1 |                |
| Synergy Pharmaceuticals, Inc.      | SGYP | 4577 Pharmaceuticals                             | 1 |                |
| Synta Pharmaceuticals Corp.        | SNTA | 4577 Pharmaceuticals                             | 1 |                |
| Synthetic Biologics, Inc           | SYN  | 4577 Pharmaceuticals                             | 1 |                |
| Targacept, Inc.                    | TRGT | 4577 Pharmaceuticals                             | 1 |                |
| Team Health Holding Inc.           | TMH  | 4533 Health Care Providers                       | 1 |                |
| TearLab Corporation                | TEAR | 4535/4537 Medical Equipment and Medical Supplies | 1 |                |
| Techne Corporation                 | TECH | 4573 Biotechnology                               | 1 |                |
| Tekmira Pharmaceuticals Corp       | TKMR | 4577 Pharmaceuticals                             | 0 | Formed in 2013 |
| Teleflex Incorporated              | TFX  | 4535/4537 Medical Equipment and Medical Supplies | 1 |                |
| Telik, Inc.                        | TELK | 4577 Pharmaceuticals                             | 1 |                |
| Tenet Healthcare Corporation       | THC  | 4533 Health Care Providers                       | 1 |                |
| TESARO, Inc.                       | TSRO | 4577 Pharmaceuticals                             | 1 |                |
| THE COOPER COMPANIES, INC          | COO  | 4535/4537 Medical Equipment and Medical Supplies | 1 |                |
| The Ensign Group, Inc.             | ENSG | 4533 Health Care Providers                       | 1 |                |
| The Medicines Company              | MDCO | 4577 Pharmaceuticals                             | 1 |                |
| The Providence Service Corporation | PRSC | 4533 Health Care Providers                       | 1 |                |
| The Spectranetics Corporation      | SPNC | 4573 Biotechnology                               | 1 |                |
| Theragenics Corp.                  | TGX  | 4535/4537 Medical Equipment and Medical Supplies | 1 |                |
| TherapeuticsMD, Inc.               | TXMD | 4577 Pharmaceuticals                             | 1 |                |
| Theravance, Inc.                   | THRX | 4577 Pharmaceuticals                             | 1 |                |
| Thermo Fisher Scientific Inc.      | TMO  | 4535/4537 Medical Equipment and Medical Supplies | 1 |                |
| Thoratec Corporation               | THOR | 4573 Biotechnology                               | 1 |                |
| Threshold Pharmaceuticals, Inc.    | THLD | 4577 Pharmaceuticals                             | 1 |                |
| Transcept Pharmaceuticals, Inc.    | TSPT | 4577 Pharmaceuticals                             | 1 |                |
| Triple-S Management Corp. Cl B     | GTS  | 4533 Health Care Providers                       | 1 |                |

|                                             |      |                                                  |   |                |
|---------------------------------------------|------|--------------------------------------------------|---|----------------|
| TrovaGene, Inc.                             | TROV | 4573 Biotechnology                               | 1 |                |
| U.S. Physical Therapy, Inc.                 | USPH | 4533 Health Care Providers                       | 1 |                |
| Unilife Corporation                         | UNIS | 4535/4537 Medical Equipment and Medical Supplies | 1 |                |
| United Therapeutics Corporation             | UTHR | 4577 Pharmaceuticals                             | 1 |                |
| UnitedHealth Group Incorporated             | UNH  | 4533 Health Care Providers                       | 1 |                |
| Universal American Corp.                    | UAM  | 4533 Health Care Providers                       | 1 |                |
| Universal Health Services, Inc.             | UHS  | 4533 Health Care Providers                       | 1 |                |
| Uroplasty, Inc.                             | UPI  | 4535/4537 Medical Equipment and Medical Supplies | 1 |                |
| USMD Holdings, Inc.                         | USMD | 4533 Health Care Providers                       | 1 |                |
| Utah Medical Products, Inc.                 | UTMD | 4535/4537 Medical Equipment and Medical Supplies | 1 |                |
| Valeant Pharmaceuticals International, Inc. | VRX  | 4577 Pharmaceuticals                             | 1 |                |
| Vanda Pharmaceuticals Inc.                  | VNDA | 4577 Pharmaceuticals                             | 1 |                |
| Vanguard Health Systems Inc.                | VHS  | 4533 Health Care Providers                       | 0 | Merged in 2013 |
| Varian Medical Systems, Inc.                | VAR  | 4573 Biotechnology                               | 1 |                |
| Vascular Solutions, Inc.                    | VASC | 4535/4537 Medical Equipment and Medical Supplies | 1 |                |
| Venaxis, Inc.                               | APPY | 4573 Biotechnology                               | 1 |                |
| Ventrus Biosciences, Inc.                   | VTUS | 4577 Pharmaceuticals                             | 1 |                |
| Verastem, Inc.                              | VSTM | 4577 Pharmaceuticals                             | 1 |                |
| Vermillion, Inc.                            | VRML | 4573 Biotechnology                               | 1 |                |
| Vertex Pharmaceuticals Incorporated         | VRTX | 4577 Pharmaceuticals                             | 1 |                |
| Vical Incorporated                          | VICL | 4573 Biotechnology                               | 1 |                |
| ViroPharma Incorporated                     | VPHM | 4577 Pharmaceuticals                             | 1 |                |
| VirtualScopics, Inc.                        | VSCP | 4535/4537 Medical Equipment and Medical Supplies | 1 |                |
| Vision-Sciences, Inc.                       | VSCI | 4573 Biotechnology                               | 1 |                |
| VIVUS, Inc.                                 | VVUS | 4577 Pharmaceuticals                             | 0 | No DEF14A form |
| Volcano Corporation                         | VOLC | 4573 Biotechnology                               | 1 |                |
| Walgreen Co.                                | WAG  | 4533 Health Care Providers                       | 1 |                |
| Waters Corp.                                | WAT  | 4535/4537 Medical Equipment and Medical Supplies | 1 |                |
| Watson Pharmaceuticals Inc.                 | WPI  | 4577 Pharmaceuticals                             | 0 | Merged in 2013 |
| WellCare Health Plans, Inc.                 | WCG  | 4533 Health Care Providers                       | 1 |                |
| WellPoint Inc.                              | WLP  | 4533 Health Care Providers                       | 1 |                |
| West Pharmaceutical Services Inc.           | WST  | 4535/4537 Medical Equipment and Medical Supplies | 1 |                |
| Wright Medical Group, Inc.                  | WMGI | 4535/4537 Medical Equipment and Medical Supplies | 1 |                |
| XenoPort, Inc.                              | XNPT | 4577 Pharmaceuticals                             | 1 |                |
| XOMA Corporation                            | XOMA | 4577 Pharmaceuticals                             | 1 |                |
| Zalicus Inc.                                | ZLCS | 4577 Pharmaceuticals                             | 1 |                |
| ZELTIQ Aesthetics, Inc.                     | ZLTQ | 4573 Biotechnology                               | 1 |                |
| Zimmer Holdings, Inc.                       | ZMH  | 4535/4537 Medical Equipment and Medical Supplies | 1 |                |
| ZIOPHARM Oncology Inc                       | ZIOP | 4533 Health Care Providers                       | 1 |                |
| Zogenix, Inc.                               | ZGNX | 4577 Pharmaceuticals                             | 1 |                |
